# Supplementary material for: A novel group of genes that cause endocrine resistance in breast cancer identified by dynamic gene expression analysis
Source: PubMed Central journal article supplement (PMC8986262; doi:10.18632/oncotarget.28225), 2022-04-06
Supplement: oncotarget-13-28225-s001.pdf [file oncotarget-13-28225-s001.pdf]

## A novel group of genes that cause endocrine resistance in breast cancer identified by dynamic gene expression analysis

### SUPPLEMENTARY MATERIALS

**Supplementary Table 1: List of candidate genes underlying endocrine resistance development and progression**

| Module | Gene symbol | Gene ontology                            |
|--------|-------------|------------------------------------------|
| 1      | CDK1        | Cell cycle                               |
| 1      | FEN1        | DNA repair                               |
| 1      | H2AFX       | DNA repair                               |
| 1      | MCM2        | Cell cycle                               |
| 1      | MCM3        | Cell cycle                               |
| 1      | MCM4        | Cell cycle                               |
| 1      | MCM6        | Cell cycle                               |
| 1      | MCM7        | Cell cycle                               |
| 1      | MSH2        | DNA repair                               |
| 1      | MSH6        | DNA repair                               |
| 1      | POLD1       | DNA repair                               |
| 1      | PRKDC       | DNA repair and Immune response           |
| 1      | RAD51       | DNA repair                               |
| 1      | RECQL4      | DNA repair                               |
| 1      | RFC3        | DNA repair                               |
| 1      | RFC5        | DNA repair                               |
| 1      | SMC4        | Cell cycle                               |
| 1      | TCF3        | DNA binding                              |
| 1      | TMPO        | Cell-cell adhesion                       |
| 1      | TUBB        | Cell cycle                               |
| 2      | CAV2        | ER organization and cell differentiation |
| 2      | CCNT2       | Cell cycle                               |
| 2      | CD59        | ER to Golgi vesicle mediated transport   |
| 2      | ELAVL1      | Regulation of RNA stability              |
| 2      | GABARAPL2   | Autophagy                                |
| 2      | MYOF        | Plasma membrane repair                   |
| 2      | PPM1A       | Cell cycle                               |
| 2      | PTPN3       | Cell cycle                               |
| 2      | SH3GLB2     | Cell-cell adhesion                       |
| 2      | TBC1D20     | ER to Golgi vesicle mediated transport   |
| 2      | USP47       | Cell cycle                               |
| 3      | ATG3        | Autophagy                                |
| 3      | CCNE1       | Cell cycle                               |
| 4      | MFAP4       | Cell-cell adhesion                       |

**Supplementary Table 2: List of the primers used in qPCR**

| <b>Gene</b> | <b>Forward primer</b>  | <b>Reverse primer</b>   |
|-------------|------------------------|-------------------------|
| <b>CDK1</b> | GGAAACCAGGAAGCCTAGCATC | GGATGATTCAGTGCCATTTTGCC |
| <b>MCM2</b> | TGCCAGCATTGCTCCTTCCATC | AAACTGCGACTTCGCTGTGCCA  |
| <b>CAV1</b> | CCAAGGAGATCGACCTGGTCAA | GCCGTCAAAACTGTGTGTCCCT  |
